# Supplementary material
Source: PubMed Central journal article supplement (PMC3589093)
Supplement: embor20133s1.pdf [file embor20133s1.pdf]

## SUPPLEMENTAL INFORMATION TO DURDEVIC ET AL.

### Supplemental methods

#### Fly strains

*w*<sup>1118</sup> (Bloomington), *w*<sup>1118</sup>; *Dnmt2*<sup>99</sup> (Schaefer et al, 2010), *w*<sup>1118</sup>/Y-HA1925 and *w*<sup>1118</sup>/Y-HA1925; *Dnmt2*<sup>149</sup> (Phalke et al, 2009), D2-TG (*w*<sup>1118</sup>; pGeno>>*Dnmt2*-EGFP; Schaefer et al., 2008), D2-OE (*w*<sup>1118</sup>; pUbq>>*Dnmt2*-EGFP), D2-catΔ (*w*<sup>1118</sup>; *Dnmt2*<sup>99</sup>; pUbq>>*Dnmt2*-cat<sup>mutant</sup>-FLAG), Act5C-GAL4/CyO Ubi-GFP (cross of Bloomington 4888 and 4414), *y*<sup>d2</sup> *w*<sup>1118</sup>; *Dcr-2*<sup>L811fsX</sup> (Bloomington). All flies were kept at 25°C on standard *Drosophila* medium.

#### Heat shock experiments

Heat shock treatments of 2nd to third instar larvae were performed at 37°C for 2 times 45 minutes (with an interval of 1 hour recovery time) in a water bath. After the heat shock larvae were kept at 25 °C on standard *Drosophila* medium until hatching.

#### RNA extraction, reverse transcription (RT) and q-PCR

Total RNA was extracted using Trizol (Invitrogen). The RNA was isolated from whole flies. For first strand cDNA synthesis, RNA was either reverse-transcribed using the QuantiTect Reverse Transcription Kit (Qiagen) or was treated with TurboDNase (Ambion), before reverse transcription using SuperScript III (Invitrogen). qPCR analyses (primers, Table S4) were performed on a LightCycler 480 Real Time PCR System (Roche) using the ABsolute QPCR SYBR Green Mix (Thermo Scientific)

#### Diagnostic PCR

Genomic DNA from whole flies was extracted using the DNeasy Blood and Tissue Kit (Qiagen). Diagnostic q-PCR analyses were performed on 100 ng of genomic DNA per reaction on a LightCycler 480 Real Time PCR System (Roche) using the ABsolute QPCR SYBR Green Mix (Thermo Scientific).

### **Northern blotting**

RNA was separated on Urea-PAGE or Formamid-Gels, transferred to Nylon membranes (Roche) and hybridized overnight at 40°C with DIG-labeled PCR probes (primers, Table S4). For probe labeling, 1 nmol DIG-dUTP (Roche) was used in a standard PCR reaction using genomic DNA as a template. Pre-hybridization, washing steps, incubation with antibodies and detection were performed according to the manufacturer's recommendations (DIG Northern Starter Kit, Roche).

### **Immunostainings of gut tissues**

After inoculation by feeding, animals were incubated for 24 hours on normal food. Gut tissues were dissected in PBS, fixed for 15 minutes in 4% paraformaldehyde in PBS. Tissues were washed with PBS/0.05% Triton X-100, blocked in blocking solution (3% BSA, 0.05% Triton X-100, 0.05% sodium azide in PBS). Incubation with primary antibodies (anti-EGFP, Abcam, 1:1000; anti-DCV capsid, 1:5000) was performed in the cold (over night). Secondary antibodies (Alexa Fluor-conjugated, Invitrogen) were applied for 2 hours at room temperature. Samples were analyzed by confocal laser scanning microscopy (TCS SP2, Leica Microsystems, Germany).

### **RNA immunoprecipitations**

Inoculation of D2-TG recipients was performed as described above but continuously for 72 hours. Adult flies were homogenized in Empigen buffer (HEPES-KOH pH 7.4, 30 mM; NaCl 150 mM; MgOAc 2 mM; Empigen 0.5%, 0.01 U/μl RNAsIn; DTT 5 mM, PMSF 1mM, 1x Protease Inhibitors). Tissue was disrupted by 20 strokes in a douncer, followed by centrifugation for 30 minutes at 16.000g. 1.2 mg of total protein extracts were incubated with EGFP nanobodies (ChromoTek) for 1 hour at 4°C. Paramagnetic beads were washed in Empigen buffer, followed by proteinase K digestion (0.2 mg/ml) for 30 minutes at 37°C and Phenol/Chloroform extraction of bound RNA.

### **Fly infection by feeding**

Inoculation experiments were performed with crude extracts from 200 μg of *w*<sup>1118</sup>, *Dnmt2*<sup>99</sup>, D2-

TG flies. After homogenization in 500 µl H<sub>2</sub>O, carcasses were mixed with 500 µl yeast paste. This mix (donors) was used for feeding of freshly hatched flies (recipients). After 24 hours flies were transferred to standard *Drosophila* medium and RNA was isolated at specified time points.

### **Supplemental references**

Schaefer M, Pollex T, Hanna K, Tuorto F, Meusburger M, Helm M, Lyko F (2010) RNA methylation by Dnmt2 protects transfer RNAs against stress-induced cleavage. *Genes & Development* **24**(15): 1590-1595

Phalke S, Nickel O, Walluscheck D, Hortig F, Onorati MC, Reuter G (2009) Retrotransposon silencing and telomere integrity in somatic cells of *Drosophila* depends on the cytosine 5 methyltransferase DNMT2. *Nat. Genet.* **41**(6): 696-702

Schaefer M, Steringer JP, Lyko F (2008) The *Drosophila* Cytosine-5 Methyltransferase Dnmt2 Is Associated with the Nuclear Matrix and Can Access DNA during Mitosis. *PLoS ONE* **3**(1): e1414

Durdevic\_Figure S1

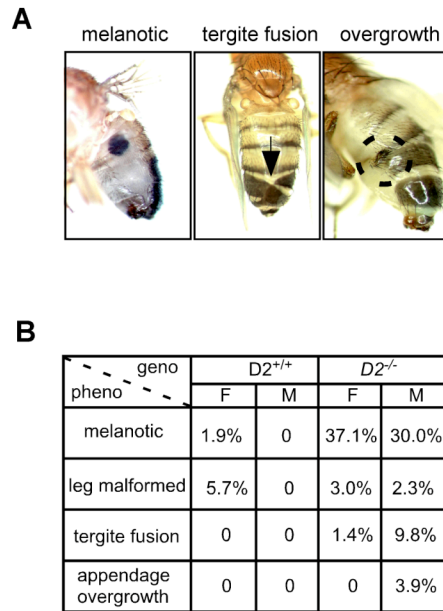

**Fig S1.** Stress-Induced phenotypic changes in *Dnmt2* mutant adults

**(A)** Melanotic lesions can be induced by heat shock treatment. Examples of melanotic lesion (left), incomplete tergite fusion (middle, arrow) and appendage overgrowth (right, dashed circle) in flies, originating from heat-shocked larvae of the genotypes:  $w^{1118}/Y$ -HA1925 ( $D2^{+/+}$ ) and  $w^{1118}/Y$ -HA1925; *Dnmt2*<sup>149</sup> ( $D2^{-/-}$ ).

**(B)** Quantification of phenotypic abnormalities in wildtype ( $D2^{+/+}$ , n=100) and *Dnmt2* mutant ( $D2^{-/-}$ , n=126) flies from experiments as described in **(A)**.

A

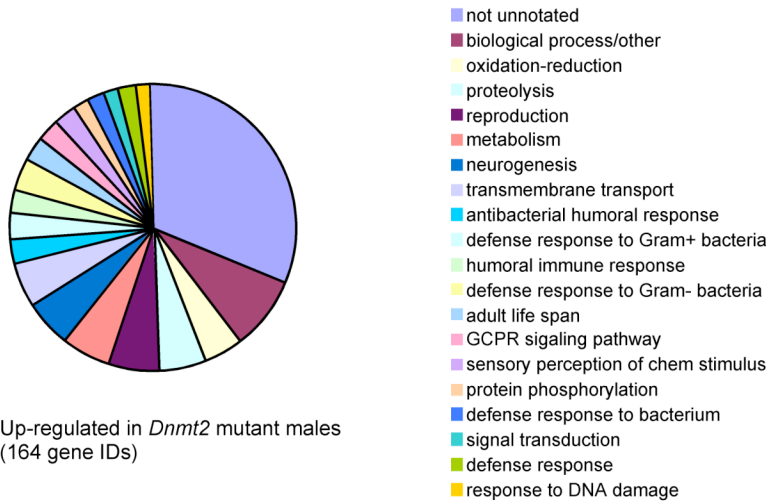

B

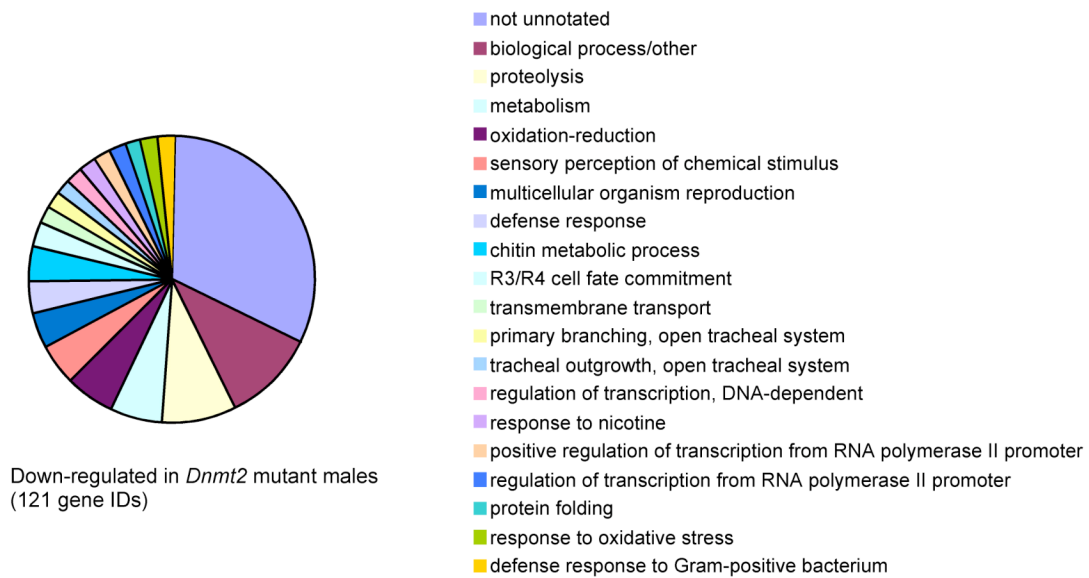

**Fig S2.** Mis-Regulation of gene expression in adult *Dnmt2* mutants

**(A)** *Dnmt2* mutants up-regulate genes across a wide range of biological processes. Genes up-regulated at least 2-fold (see **Table S1**) were assigned functional categories using the GO annotation of the Flybase consortium (<http://flybase.org/>)

**(B)** *Dnmt2* mutants down-regulate genes across a wide range of biological processes. Genes down-regulated at least 2-fold (see **Table S2**) were assigned functional categories using the GO annotation of the Flybase consortium (<http://flybase.org/>)

A

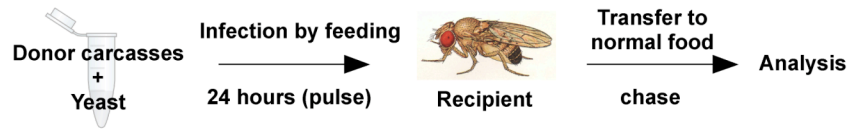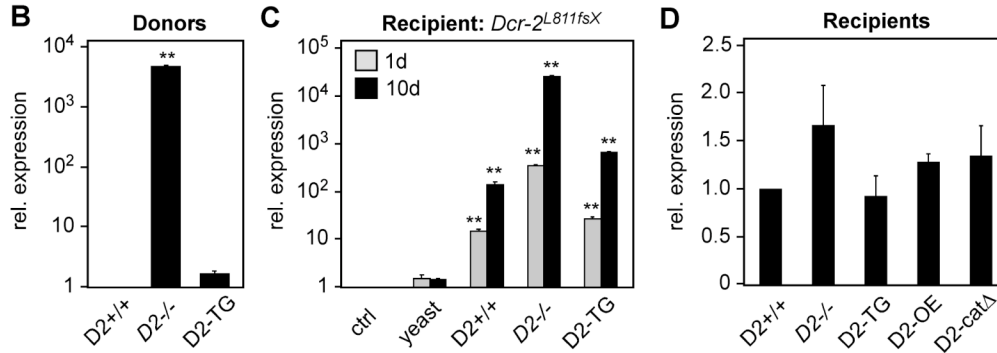

**Fig S3.** Infection-by-feeding experiment

**(A)** Design of infection experiments using adult donors and recipients. Feeding of recipients with donors was carried for 24 hours (pulse) before flies were moved to standard food (chase) until analysis.

**(B)** Q-PCR analysis for DCV in 30 days old wildtype (D2<sup>+/+</sup>), *Dnmt2* mutant (D2<sup>-/-</sup>) and transgenic rescue (D2-TG) donors.

**(C)** Q-PCR analysis for DCV in *Dicer-2* mutant recipients (*Dcr-2<sup>L811fsX</sup>*) after feeding with donors as described in **(B)**. Two time points after infection (1 day, grey bars; 10 days, black bars) were analyzed.

**(D)** Q-PCR analysis for DCV in freshly hatched recipients.

RNA expression of virus was set to 1 in non-infected (ctrl) and normalized to *rp49* mRNA in individual experiments. Error bars represent standard deviations from three biological replicates. Student's t-test p-values are indicated (\* p<0.05; \*\*p<0.01).

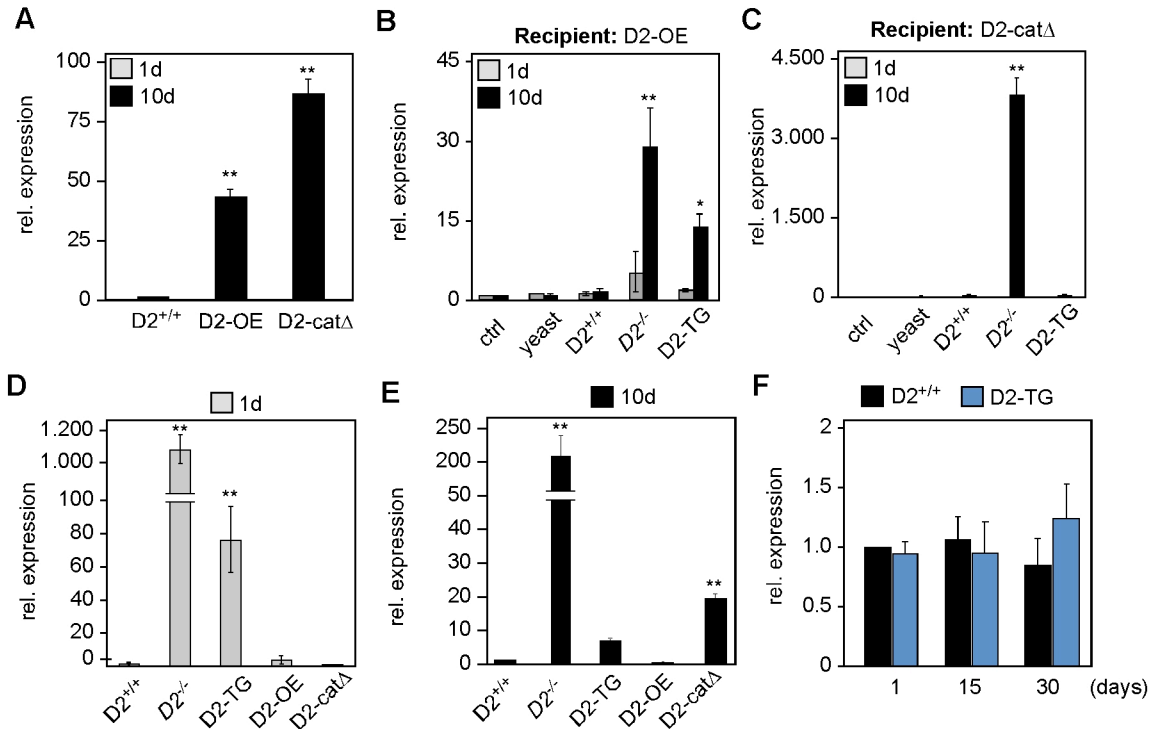

**Fig S4.** The catalytic activity of Dnmt2 contributes to DCV suppression.

**(A)** Q-PCR analysis for Dnmt2 mRNA expression in wild-type flies (D2<sup>+/+</sup>), wild-type flies that over-express Dnmt2 (*w*<sup>1118</sup>; pUbq>>*Dnmt2*; D2-OE) and *Dnmt2* mutant flies expressing a catalytically inactive *Dnmt2* (D2<sup>-/-</sup>; pUbq>>*Dnmt2-catΔ*-FLAG).

RNA expression of Dnmt2 was normalized to *rp49* mRNA and set to 1 in wild-type flies (D2<sup>+/+</sup>). Error bars represent standard deviations from three biological replicates. Student's t-test p-values are indicated (\*\*p<0.01).

**(B)** Q-PCR analysis for DCV expression in recipient flies that over-express Dnmt2 (*w*<sup>1118</sup>; pUbq>>*Dnmt2*; D2-OE) after feeding with donors as described in **Fig 3A** and incubation periods of 1 or 10 days.

**(C)** Q-PCR analysis for DCV expression in recipient *Dnmt2* mutant flies expressing a catalytically inactive *Dnmt2* (D2<sup>-/-</sup>; pUbq>>*Dnmt2-catΔ*-FLAG) after feeding with donors as in **(B)**. RNA expression was set to 1 in controls at day 1 and normalized to *rp49* in individual experiments. Error bars represent standard deviations from 3 biological replicates.

RNA expression of virus was set to 1 in non-infected (ctrl) and normalized to *rp49* mRNA in individual experiments. Error bars represent standard deviations from three biological replicates. Student's t-test p-values are indicated (\* p<0.05; \*\*p<0.01).

**(D)** Comparison of the DCV levels of various recipients that were fed with *Dnmt2* mutant donors at day 1. Data were extracted from **(B-C)** and **Fig 3A**. DCV levels were set to 1 in wild-type recipients at day 1.

**(E)** Comparison of the DCV levels of various recipients that were fed with *Dnmt2* mutant donors at day 10. Data were extracted as described in **(D)**. DCV levels were set to 1 in wild-type recipients at day 10.

Error bars represent standard deviations from three biological replicates. Student's t-test p-values are indicated (\*\*p<0.01).

**(F)** Q-PCR analysis for *Dnmt2* mRNA expression in wildtype ( $D2^{+/+}$ ) and transgenic rescue (D2-TG) flies at three different ages (1, 15, 30 days after hatching).

RNA expression of *Dnmt2* was normalized to *rp49* mRNA and set to 1 in wild-type flies ( $D2^{+/+}$ ). Error bars represent standard deviations from three biological replicates.
