# Supplementary material
Source: PubMed Central journal article supplement (PMC3589093)
Supplement: embor20133s5.pdf [file embor20133s5.pdf]

**Table S4:** PCR primer sequences

| Quantitative PCR primers |                      |                                                         |
|--------------------------|----------------------|---------------------------------------------------------|
| HD86                     | Dnmt2-RA forward     | 5'- GTTCGTCGATCATGATACATGCG -3'                         |
| HD87                     | Dnmt2-RC forward     | 5'- CTATTTAGTGGCATTGGCGGC-3'                            |
| HD88                     | Dnmt2 reverse        | 5'- GCAGCATGTTGGCCTGAAGC -3'                            |
| HD174                    | rp49 forward         | 5'- CGGATCGATATGCTAAGCTGT -3'                           |
| HD175                    | rp49 reverse         | 5'- GCGCTTGTTCGATCCGTA -3'                              |
| HD672                    | Drosocin forward     | 5'-GTCCACCACTCCAAGCAC- 3'                               |
| HD673                    | Drosocin reverse     | 5'-CTTTAGGCGGGCAGAATGGG -3'                             |
| HD674                    | Metchnikowin forward | 5'-CGCCACCGAGCTAAGATGC -3'                              |
| HD675                    | Metchnikowin reverse | 5'-GGTTAGGATTGAAGGGCGAC -3'                             |
| HD611N                   | Vago forward         | 5'-TGCAACTCTGGGAGGATAGC -3'                             |
| HD821N                   | Vago reverse         | 5'-AATTGCCCTGCGTCAGTTT -3'                              |
| HD822N                   | Vir-1 forward        | 5'-GATCCCAATTTTCCCATCAA -3'                             |
| HD823N                   | Vir-1 reverse        | 5'-GATTACAGCTGGGTGCACAA-3'                              |
| HD824N                   | IM1 forward          | 5'-TCCACTGTGCCCCGATCC -3'                               |
| HD825N                   | IM1 reverse          | 5'-CTTGGGTTGAAACTTCCTACTTGC -3'                         |
| HD826N                   | Cecropin A1 forward  | 5'-GCGTTGGTCAGCACACTC -3'                               |
| HD827N                   | Cecropin A1 reverse  | 5'-CAGTTGCGGGCAGATTGG -3'                               |
| HDT047                   | DCV forward          | 5'-TCATCGGTATGCACATTGCT -3'                             |
| HDT048                   | DCV reverse          | 5'-CGCATAACCATGCTCTTCTG -3'                             |
| HDT053                   | Turandot A forward   | 5'-GGTTTGCTTCAGCGTTCCAAAAAGTCATAACC -3'                 |
| HDT054                   | Turandot A reverse   | 5'-ATTAAACAATATTAACCAGTGAATAATTGAG -3'                  |
| ZD123                    | Nora virus forward   | 5'-AACCTCGTAGCAATCCTCTCAAG -3'                          |
| ZD124                    | Nora virus reverse   | 5'-TTCTTGTCCGGTGTATCCTGTATC -3'                         |
| ZD119                    | DXV forward          | 5'- GGAGTTGAAGCCACGGTTTG-3'                             |
| ZD120                    | DXV reverse          | 5'- GACGATCTTGCCAGTTGGCTCATCG-3'                        |
| ZD121                    | Sigma virus forward  | 5'-ATGTAACCTCGGGTGTGACAG -3'                            |
| ZD122                    | Sigma virus reverse  | 5'- CCTTCGTTTCATCCTCCTGAG-3'                            |
| Diagnostic qPCR primers  |                      |                                                         |
| ZD245                    | fwd A. pomorum       | 5'-TGTTTCCGCAAGGGACCTCT-3'                              |
| ZD246                    | rev A. pomorum       | 5'-AGAGTGCCAGCCCAACCTGA-3'                              |
| ZD247                    | fwd A. tropicalis    | 5'-TAGCTAACGCGATAAGCACA-3'                              |
| ZD248                    | rev A. tropicalis    | 5'-ACAGCCTACCCATACAAGCC-3'                              |
| ZD249                    | fwd L. fructivorans  | 5'-AACCTGCCAGAGAAGGGGA-3'                               |
| ZD250                    | rev L. fructivorans  | 5'-GCGCCGCGGATCCATCCAAA-3'                              |
| ZD251                    | fwd L. plantarum     | 5'-TGTTCTCAGTCCCAATGTGGCCG-3'                           |
| ZD252                    | rev L. plantarum     | 5'-GGCTATCACTTTTGGATGGTCCCGC-3'                         |
| Northern probes          |                      |                                                         |
| HD174                    | rp49 forward         | 5'- CGGATCGATATGCTAAGCTGT -3'                           |
| HD175                    | rp49 reverse         | 5'- GCGCTTGTTCGATCCGTA -3'                              |
| HD672                    | Drosocin forward     | 5'-GTCCACCACTCCAAGCAC- 3'                               |
| HD673                    | Drosocin reverse     | 5'-CTTTAGGCGGGCAGAATGGG -3'                             |
| HD674                    | Metchnikowin forward | 5'-CGCCACCGAGCTAAGATGC -3'                              |
| HD675                    | Metchnikowin reverse | 5'-GGTTAGGATTGAAGGGCGAC -3'                             |
| HDT047                   | DCV forward          | 5'-TCATCGGTATGCACATTGCT -3'                             |
| HDT048                   | DCV reverse          | 5'-CGCATAACCATGCTCTTCTG -3'                             |
| stem loop RT primer      |                      |                                                         |
| HD649                    | tRNA-Asp reverse     | 5'-CTCAACTGGATTGGCTNNNNNGATAAATCCAGT<br>TGAGTGGCTCCC-3' |
| RIP primers              |                      |                                                         |
| HD254                    | tRNAAsp fwd          | 5'-TCCTCGATAGTATAGT-3'                                  |
| HD616                    | tRNAAsp rev          | 5'-CTCAACTGGATTGGCT-3'                                  |
| ZD127                    | DCV 698-1435 fwd     | 5'-GTGTATGATCTATACGCAC-3'                               |
| ZD128                    | DCV 698-1435 rev     | 5'-CAATCTTCATAATATCCTC-3'                               |
| ZD137                    | DCV 4443-5163 fwd    | 5'-GAAGAATATTTCTCAC-3'                                  |
| ZD138                    | DCV 4443-5163 rev    | 5'-GGCGAAATGCAACTACAAAATG-3'                            |
| ZD149                    | DCV 8841-9264 fwd    | 5'-CAATTAATAGTGTCTTGCCTG-3'                             |
| ZD150                    | DCV 8841-9264 rev    | 5'-AGAAAACAACATATTTTAAATTC-3'                           |
